# Supplementary material for: Catalytic oxidation of toluene over a porous Co3O4-supported ruthenium catalyst
Source: Royal Society of Chemistry journal article supplement (doi:10.1039/c5ra07072d), 2015-01-01
Supplement: c5ra07072d1.pdf [file c5ra07072d1.pdf]

## Supporting Information

### Catalytic oxidation of toluene over porous Co<sub>3</sub>O<sub>4</sub>-supported ruthenium catalyst

Xiaolong Liu<sup>a</sup>, Jian Wang<sup>a, b</sup>, Junlin Zeng<sup>a, c</sup>, Xue Wang<sup>a</sup>, Tingyu Zhu<sup>a, \*</sup>

<sup>a</sup>Beijing Engineering Research Center of Process Pollution Control, National Engineering Laboratory for Hydrometallurgical Cleaner Production Technology, Institute of Process Engineering, Chinese Academy of Sciences, Beijing 100190, China

<sup>b</sup>Graduate University of Chinese Academy of Sciences, Beijing 100049, China

<sup>c</sup>School of Chemistry and Chemical Engineering, Guizhou University, Guiyang 550003, Guizhou, China

(\* ) Corresponding author. Tel./Fax: +86-10-82544821.

E-mail address: [tyzhu@ipe.ac.cn](mailto:tyzhu@ipe.ac.cn)

#### Contents

1. The BET surface areas and pore diameters of the catalysts
2. The XPS data of the Ru-based catalysts
3. The catalytic evaluation platform

**Table S1.** The BET surface areas and pore diameters of the catalysts.

| Catalyst                               | BET surface area<br>(m <sup>2</sup> /g) | Pore diameter<br>(nm) |
|----------------------------------------|-----------------------------------------|-----------------------|
| Ru/Co <sub>3</sub> O <sub>4</sub> -MOF | 80.0                                    | 4.9                   |
| Co <sub>3</sub> O <sub>4</sub> -MOF    | 94.1                                    | 4.9                   |
| Ru/Co <sub>3</sub> O <sub>4</sub> -B   | 61.4                                    | 12.4                  |
| Co <sub>3</sub> O <sub>4</sub> -B      | 66.2                                    | 12.4                  |

**Table S2.** The XPS data of the Ru-based catalysts.

| Catalyst                               | Ru <sup>0</sup> (at.%) | Ru <sup>4+</sup> (at.%) | Ru <sup>6+</sup> (at.%) | Ru/Co |
|----------------------------------------|------------------------|-------------------------|-------------------------|-------|
| Ru/Co <sub>3</sub> O <sub>4</sub> -MOF | 2.9                    | 64.7                    | 32.4                    | 0.038 |
| Ru/Co <sub>3</sub> O <sub>4</sub> -B   | 3.7                    | 55.6                    | 40.7                    | 0.013 |

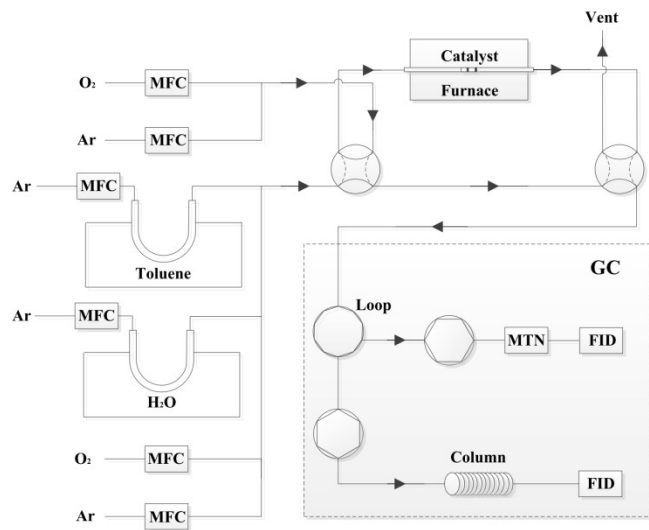

Fig. S1 The catalytic evaluation platform
